# Supplementary material for: A framework for modeling and simulating energy harvesting WSN nodes with efficient power management policies
Source: Springer Nature journal article supplement (doi:10.1186/1687-3963-2012-8), 2012-10-16

Hardware

Software

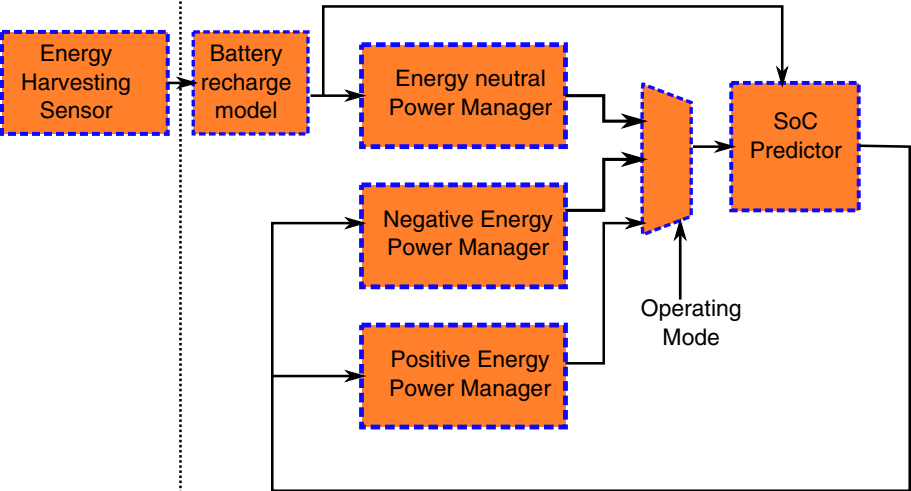

Supplement: 13639_2012_9_MOESM6_ESM.pdf [file 13639_2012_9_MOESM6_ESM.pdf]
