# Supplementary material for: A framework for modeling and simulating energy harvesting WSN nodes with efficient power management policies
Source: Springer Nature journal article supplement (doi:10.1186/1687-3963-2012-8), 2012-10-16

$\langle \text{SoC} \rangle$  [ $\mu\text{Ah}$ ],  $\langle \text{Rd} \rangle$  [bits/s],  $\text{SoC}_{\text{min}}$  [ $\mu\text{Ah}$ ]

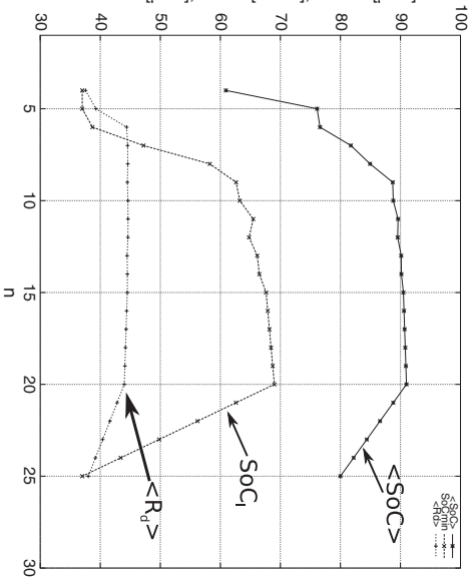

Supplement: 13639_2012_9_MOESM13_ESM.pdf [file 13639_2012_9_MOESM13_ESM.pdf]
